# Fractals in Action: An fMRI study on the Generation of new Hierarchical Levels in Motor Sequences

Mauricio J.D. Martins<sup>1,2,\*</sup>, Roberta Bianco<sup>2,\*</sup>, Daniela Sammler<sup>2</sup>, Arno Villringer<sup>1,2</sup>

<sup>1</sup>Berlin School of Mind and Brain, Humboldt-Universität zu Berlin, Berlin, Germany

<sup>2</sup>Max Planck Institute for Human Cognitive and Brain Sciences, Leipzig, Germany

\*These authors contributed equally to this work

Correspondence should be addressed to M.J.D.M ([diasmarm@hu-berlin.de](mailto:diasmarm@hu-berlin.de))

## Abstract

Generation of hierarchical structures, such as the embedding of subordinate elements into larger structures, is a core feature of human cognition. *Discrimination* of well-formed hierarchies is thought to rely on lateral prefrontal cortex (PFC). However, the brain bases underlying the *active generation* of new hierarchical levels remain poorly understood. Here, we created a new motor paradigm to isolate this *active* generative process. In fMRI, participants planned and performed (identical) movement sequences based on three previously learned rules: (1) a hierarchical ‘fractal’ rule that involved generation of new levels, (2) a linear ‘iterative’ rule adding items to existing hierarchical levels, and (3) simple ‘repetition’. We found that generation of new hierarchical levels (using the fractal rule) activated a bilateral motor planning- and imagery network, but did not involve lateral PFC. Conversely, adding items to existing hierarchical levels required M1 directly during execution. These results show that the generation of new hierarchical levels can be achieved without involvement of putative domain-general systems such as those ascribed to lateral PFC. We hypothesize that these systems might be important to *parse* hierarchical sequences in a multi-domain fashion but not necessarily to *generate* new hierarchical levels.

## Introduction

Much of what differentiates human behaviour from that of other species is related to an increased ability to represent and generate complex hierarchies (Fitch and Friederici 2012; Conway and Christiansen 2001; Everaert et al. 2015; Dehaene et al. 2015). Language, music and complex action planning are examples of human behaviours which require the representation and generation of hierarchies. The assumed centrality of this capacity to mankind has made the investigation of the underlying neural mechanisms a core topic in

1 modern cognitive sciences (Badre 2008; Fadiga, Craighero, and D’Ausilio 2009; Fitch and  
2 Martins 2014; Friederici et al. 2011; Petersson, Folia, and Hagoort 2012; Wilson, Marslen-  
3 Wilson, and Petkov 2017). Numerous studies in the domains of language, music, and vision  
4 have investigated the *discrimination* of hierarchical structures by asking participants to  
5 evaluate whether sequences of items are well-formed according to a previously learned  
6 system of rules (Bahlmann et al. 2009; Bahlmann, Schubotz, and Friederici 2008; Bianco et  
7 al. 2016; Maess et al. 2001; Sammler, Koelsch, and Friederici 2011; Friederici et al. 2011).  
8 From this body of literature it emerges that lateral prefrontal cortex (PFC, particularly  
9 Inferior Frontal Gyrus, IFG) might contribute domain-general resources to the processing of  
10 hierarchies (Patel 2003; Friederici et al. 2011; Fadiga, Craighero, and D’Ausilio 2009), in  
11 interaction with areas along ventral visual/auditory streams that may store domain-specific  
12 structural and schematic information (Oechslin, Gschwind, and James 2017; Martins et al.  
13 2014; Pallier, Devauchelle, and Dehaene 2011; Sammler et al. 2013; Bianco et al. 2016).

14 Despite the appeal and success of this framework, it remains incomplete in one  
15 essential way: It is currently unknown to which extent we can use these data from  
16 *discrimination* paradigms to understand the processes underlying the *generation* of  
17 hierarchical structures. This subtle distinction between *discrimination* and *generation*  
18 becomes more relevant when borrowing concepts from modern theories of hierarchical  
19 generativity in language (Berwick and Chomsky 2015), which propose that representing  
20 hierarchies involves (i) core generative processes, (ii) peripheral sensorimotor systems (for  
21 encoding and externalization), and (iii) interfaces between (i) and (ii). This framework  
22 implies that when the stimulus sets to be discriminated vary not only in their deep  
23 (hierarchical) structure but also in their surface (linear) structure (e.g. long-distance vs. local  
24 dependencies (AABB vs. ABAB)), they might impose different encoding and externalization  
25 demands due to peripheral parameters such as stimulus frequency, ambiguity, working  
26 memory load, etc.

27 In the present study, we investigated the *generation* of hierarchically organised  
28 behaviours and their neurocognitive bases by means of a novel paradigm in the motor domain  
29 where the generation of structures can be directly and explicitly measured at the behavioural  
30 level. Crucially, to circumvent differences related to the peripheral processes of stimulus  
31 encoding, our design experimentally separated the generative act from the externalization of  
32 structures which were derived from different rules but were identical in their surface (linear)  
33 structure, i.e. the sequential motor output.

34 So far, behavioural and neural markers of action production have been extensively  
35 studied typically in contexts of (i) fast production of movement sequences without  
36 hierarchical relations (Hardwick et al. 2013; Elsinger, Harrington, and Rao 2006; Héту et al.  
37 2013) and (ii) representation of hierarchical relations within action sequences but without  
38 generation of new hierarchical levels (Fazio et al. 2009; Koechlin and Jubault 2006).

39 The first stream of research is based on classical serial reaction time tasks (SRTT),  
40 based on the execution of sequences of items characterised by simple adjacent dependencies.  
41 This research has demonstrated that the learning of motor sequences is supported by a  
42 network including premotor and motor cortices (PMC and M1), superior parietal lobe (SPL)

1 supplementary motor area (SMA), pre-SMA, left thalamus and right cerebellum (Hardwick et  
2 al. 2013). Furthermore, “planning” (defined as keeping a given motor sequence in short-term  
3 memory between the time of cue presentation and the time of execution) recruited a bilateral  
4 network comprising the sensorimotor and premotor cortices, cerebellum and the basal ganglia  
5 (Boecker et al. 2008; Elsinger, Harrington, and Rao 2006).

6 The second stream of research has focused on the neural bases supporting the  
7 hierarchical processing of actions (when certain acts are encoded as part of higher-order  
8 actions) (Fazio et al. 2009; Koechlin and Jubault 2006). These studies typically compare  
9 higher vs. lower levels of given and fixed hierarchical action structures and have revealed  
10 posterior-to-anterior activation gradients along lateral PFC with increasing hierarchy level.  
11 For instance, sequences of simple finger movements (left and right button presses) activate  
12 more anterior regions in lateral PFC when the movements are organized in superordinate  
13 clusters compared to un-clustered movement sequences (Koechlin and Jubault 2006). Some  
14 authors (Badre and D’Esposito 2009; Badre 2008) extrapolated these findings to everyday  
15 actions and hypothesize that when certain actions (e.g. slicing bread) occur within higher-  
16 order contexts (e.g. making a sandwich) these are encoded more anteriorly in lateral PFC in  
17 comparison to when the movement occurs without such higher-order action goal.

18 Overall, these studies provide neural evidence for (i) generative capacity but restricted  
19 to linear motor sequences and (ii) hierarchical processing of actions, but without generation  
20 of new hierarchical levels. The present study combined these two approaches to go a step  
21 further and probe the mechanisms underlying the internally driven generation of  
22 hierarchically organised motor sequences. Delineating the operational limits of different  
23 generative procedures (linear and hierarchical) is essential to uncover the neural bases  
24 specifically supporting the generation of motor hierarchies. More broadly, it may become  
25 critical to our understanding of how we represent generative rules in other domains, such as  
26 language and music.

27 Our approach involved the comparison of brain activity during active generation of  
28 motor sequences that follow different rules (‘Iterative’, ‘Fractal’) which can be used to  
29 generate or transform hierarchies (Martins 2012; Hulst 2010; Martins, Martins, and Fitch  
30 2015). The first rule is called ‘Iterative’ and adds items linearly within levels of a given  
31 hierarchy without generating new levels. For example, with the rule “add 1 B subordinate to  
32 A”, we can start from [A[B]] and generate A[BB], [A[BBB]], and so forth. The second rule  
33 is called ‘Fractal’ and allows the generation of new hierarchical levels. For instance, with the  
34 rule “add 2  $\alpha$  subordinate to  $\alpha$ ” we start with [ $\alpha$ ] and generate the hierarchies [ $\alpha$ [ $\alpha\alpha$ ]],  
35 [ $\alpha$ [ $\alpha$ [ $\alpha\alpha$ ]  $\alpha$ [ $\alpha\alpha$ ]]], and so forth. These fractal principles can be described with a recursive  
36 notation [ $\alpha$ ]  $\rightarrow$  [ $\alpha$  [ $\alpha\alpha$ ]], as in Lindenmayer systems (Lindenmayer 1968). This kind of re-  
37 write rules have been used to describe supra-regular grammars in linguistic syntax (Fitch and  
38 Friederici 2012), as well as visual (Martins, Martins, and Fitch 2015), melodic (Martins et al.  
39 2017) and rhythmic fractals (Geambasu, Ravignani, and Levelt 2016), while experimental  
40 evidence for the use of these rules during explicit production of new hierarchical levels and  
41 their neural instantiation is still lacking.

42 In this fMRI study, we isolate how participants generate new hierarchical levels by  
43 contrasting Iterative and Fractal rules. Importantly, we do so in production (not

1 discrimination) of well-formed hierarchies. Moreover, we use a procedure that separates the  
2 core generative act from its encoding/externalization components: In our task, participants  
3 performed sequences of finger movements evolving in three consecutive steps according to  
4 (1) the linear Iterative rule, (2) the hierarchical Fractal rule, or (3) simple Repetition of the  
5 preceding step. While participants executed the movements of the first two steps (I and II)  
6 that established the rule following visual cues, they freely generated the last step (III) by  
7 applying the rule themselves, without visual support. By focusing on the transition between  
8 steps II and III, we were able to isolate the neural representations involved in the generation  
9 of new hierarchical levels. Simple Repetition allowed us to extract a non-generative baseline.

10 From the literature reviewed above, two hypotheses emerge: (1) the generation of new  
11 hierarchical levels requires the recruitment of systems thought to be involved in the  
12 processing of well-formed hierarchies in action and across domains (with special focus on  
13 lateral PFC and IFG); or (2) this capacity can be supported by domain-specific networks  
14 known to instantiate motor operations. Our results speak in favour of the second hypothesis.

15

16

## Methods

### 17 Participants

18 20 healthy participants (11 males and 9 females, age range 21-35,  $M = 26.5$ ) took part  
19 in the study. All participants were non-musicians. None had more than 2 years of music  
20 training, and none practiced regularly with a musical instrument. All had normal or corrected-  
21 to-normal vision and audition, no history of neurological or psychiatric disease. All  
22 participants were right-handed German native speakers. Participants were recruited from a  
23 pool of subjects able to perform all behavioral tasks successfully (see below). They gave  
24 written informed consent before the experiment in accordance with the local ethics  
25 committee and were paid 8 Euros/hour for their participation.

### 26 Task and Stimuli

27 Participants were asked to produce sequences of finger movements on a keyboard  
28 with 16 keys. They had to press a correct set of keys in the correct order, and with the correct  
29 timing. The keyboard contained visual and tactile markers on keys 3, 5, 7, 10, 12 and 14  
30 (from left-to-right) for spatial reference (see Figure 1). The temporal structure (see Figure  
31 1A) was given by an auditory metronome sounding at 60bpm (4 beats per second delivered  
32 through MR-compatible headphones).

33 The typical trial was composed of three steps (I, II and III), and these steps unfolded  
34 according to one of three rules: Fractal, Iterative and Repetition (Figure 1). In steps I and II,  
35 participants executed the motor sequences as displayed visually on screen. The relation  
36 between steps I and II were determined by the underlying rule. Then, in step III, they were  
37 asked to generate a third motor sequence without visual guidance, corresponding to the  
38 correct continuation of step II using that particular rule.

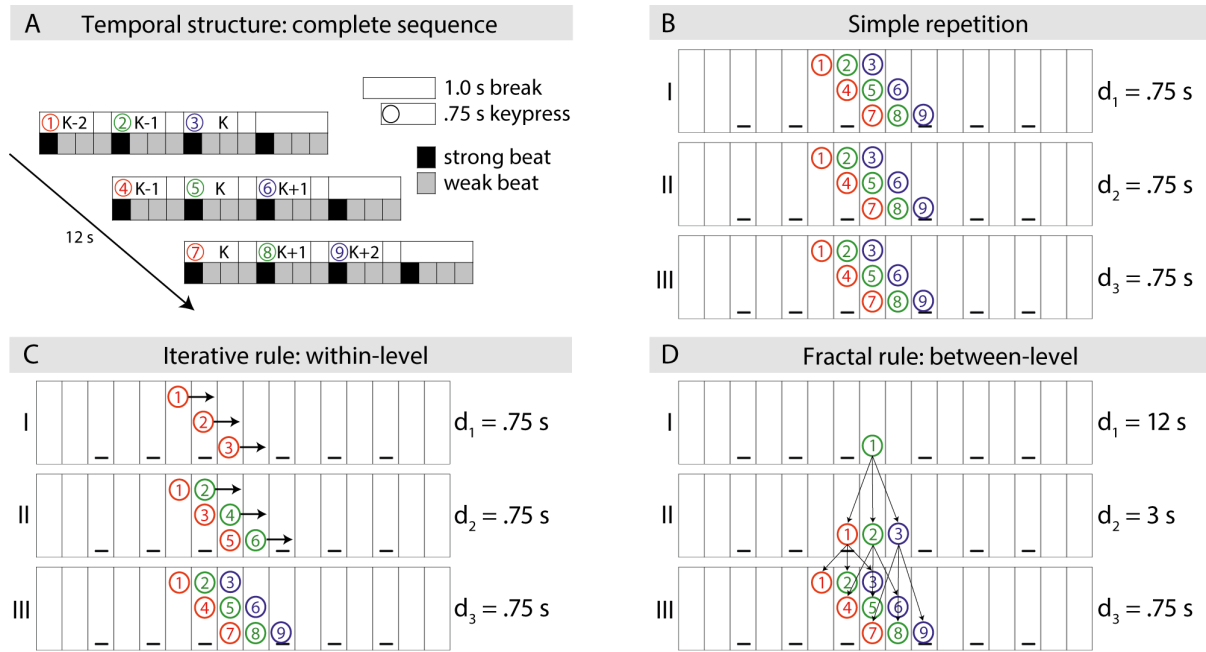

1

2 **Figure 1. Task principles.** In this task, participants were asked to generate sequences of  
 3 finger movements (ordered from 1 to 9) by pressing keys on the keyboard with the thumb,  
 4 index and middle finger (red, green and blue). These sequences were formed in three steps (I,  
 5 II and III) which followed one of three rules: Simple Repetition, Iteration and Fractal.  
 6 During steps I and II, participants executed the motor sequence as displayed on the screen.  
 7 In step III, they were asked to generate the final sequence without visual support.

8 **A) Temporal structure:** In step III, all rules resulted in the same complete sequence of 9  
 9 movements, here  $[[K-2, K-1, K], [K-1, K, K+1], [K, K+1, K+2]]$ .  $K$  is the key in the spatial  
 10 center of the pattern. The sequence lasted 12 seconds and was aligned with a metronome  
 11 with 4 beats per second (1 strong and 3 weak). Key presses started at the onset of the strong  
 12 beat, and were released at the onset of the third weak beat, thus, each key press had the  
 13 duration ( $d$ ) = .75s. Hierarchical clustering within the sequence (3 clusters of 3 items)  
 14 was given by the fingering pattern (red, green and blue) and the temporal structure (1s break  
 15 after each cluster).

16 **B) Simple Repetition:** Consisted of the repetition of the complete sequence 3 times.

17 **C) Iterative rule:** Step I was composed of 3 key presses executed with the thumb, each with  $d$   
 18 = .75s, on the first (strong) beat of each cluster  $[[K-2, \_ , \_], [K-1, \_ , \_], [K, \_ , \_]]$ . In step  
 19 II, a second key press with the index was added to each chunk:  $[[K-2, K-1, \_], [K-1, K, \_],$   
 20  $[K, K+1, \_]]$ . Thus, the iterative rule added elements to pre-existing hierarchical levels,  
 21 without generating new levels. Step III was simply the serial completion of the pattern with  
 22 the middle finger  $[[K-2, K-1, K], [K-1, K, K+1], [K, K+1, K+2]]$ .

23 **D) Fractal rule:** Step I was a single key press with the index finger on key  $K$  with  $d = 12$ s.  
 24 Step II was a sequence of three key presses  $[K-1, K, K+1]$  executed with the thumb, index,  
 25 and middle finger, each with  $d = 3$ s and 1s break after each key press. The underlying fractal  
 26 rule was the substitution of each key press  $K_n$  with duration  $d_n$  with a sequence of three key

1 presses  $[K_{n+1} - 1, K_{n+1}, K_{n+1} + 1]$ , each with duration  $d_n/4$  and followed by a break  $d_n/12$ . Step  
2 III was obtained by applying the same transformation rule to each key press in step II thus  
3 obtaining the complete sequence  $[[K-2, K-1, K], [K-1, K, K+1], [K, K+1, K+2]]$ .

4

5 The sequences comprising the first two steps were depicted visually on a computer  
6 screen by projecting colored circles onto the keys of a virtual keyboard. Different colors  
7 denoted the different fingers that participants had to use to press the keys (red: thumb, green:  
8 index and blue: middle finger). Thus, participants were asked to press the correct keys with  
9 the correct fingers, as demonstrated on the screen, synchronized both with the visual cues  
10 (coloured circles) and with the metronome beats. In these two first steps, participants were  
11 guided in the application of the rule. Then in step III, participants were asked to generate the  
12 correct continuation of step II, hence, to apply the rule one step further without the visual  
13 cues and following the temporal structure (Figure 1A).

14 The application of different rules always generated a final motor sequence of the kind  
15  $[[K - 2s, K - s, K], [K - s, K, K + s], [K, K + s, K + 2s]]$ . To increase stimulus variability, we  
16 introduced the changeable parameters  $s$  and  $k_0$ . The parameter  $s$  could be a value within the  
17 set  $\{-2, -1, 1, 2\}$ . If  $s$  was positive (1 or 2) the sequences were *ascending*, meaning that they  
18 unfolded from left to right on the keyboard (e.g.  $[K-1, K, K+1]$ ). If  $s$  was negative (-1 or -2)  
19 the sequence was *descending*, meaning that sequences unfolded from right to left on the  
20 keyboard (e.g.  $[K+1, K, K-1]$ ). When  $s = 1$  or  $-1$ , the sequence (within each cluster) was  
21 formed by *adjacent* keys ( $[K+1, K, K-1]$ ), and when  $s = 2$  and  $-2$  the sequence was formed by  
22 *non-adjacent* keys, meaning that there was a space of one key between a pair of elements  
23 within the cluster (e.g.  $[K-2, K, K-2]$ ). The initial key  $k_0$  could be one of the middle four keys  
24 of the keyboard  $\{7, 8, 9, 10\}$ . Overall, these variations produced 16 different sequences,  
25 which were perfectly balanced across conditions. Crucially, these parameters had to be  
26 recognized during steps I and II, in order to correctly generate the sequence in step III.

## 27 **Pretest**

28 All participants took part in a behavioral session up to one week before the fMRI  
29 experiment. The goal of this session was to instruct participants explicitly about the task  
30 rules, to assess their understanding of those rules and to train them in the execution of the  
31 motor sequences. Note that none of the participants had experience in playing music,  
32 particularly not in playing on a piano. The session lasted approximately 2 hours. Participants  
33 started by performing a beat perception task (part of the battery used in Müllensiefen et al.,  
34 2014), to evaluate whether they were able to understand the synchrony between two temporal  
35 events (a metronome and a music piece). Then, they were shown a slideshow explaining the  
36 task rules, and video examples with the motor sequences they had to perform.

37 After the instructions, participants performed a supervised session comprising 10 trials  
38 following the Fractal rule. A researcher was in the room supervising this session,  
39 incentivizing the participants to follow the temporal structure and to use the visual landmarks  
40 to find the correct keys. Here, they were again asked to execute the sequences as depicted on  
41 the screen, but not asked to mentally generate the sequences by themselves. Steps I, II and III

1 were all presented visually on screen (unlike in the task used in the MR scanner). The goal of  
2 this phase was to train the participants with correct exemplars. We repeated this procedure for  
3 the Iterative rule.

4 If participants were able to execute adequately the Fractal and Iterative sequences, they  
5 proceeded to a final session, similar to the one used in the fMRI. This session was composed  
6 of 20 trials including 8 trials following the Fractal rule, 8 trials following the Iterative rule,  
7 and 4 trials following the simple Repetition. In this last session, step III was not cued  
8 visually, and participants had to generate the sequence by themselves, without visual support,  
9 but following the metronome, as later in the MR scanner.

10 Accuracy was measured as the number of correct keys pressed at the correct time – within the  
11 interval [-.25s, 1s] locked to the onset of the appropriate beat. Each trial contained 9 expected  
12 key presses in step III.

13 Participants with accuracy >80% in the last session, for all rules, were invited to participate in  
14 the fMRI experiment. Out of 39 participants performing the pretest, only 21 fulfilled this  
15 criterion.

## 16 **fMRI Procedure**

17 On the day of fMRI data acquisition, participants were again debriefed on the task  
18 rules, then positioned in the scanner and asked to perform a short test session of 6 trials. If  
19 they were able to perform adequately, we proceeded with the anatomical and functional data  
20 acquisition. Only one participant was excluded due to inability to replicate the experiment  
21 within the MR experimental apparatus. The whole procedure (briefing, scanning, and post  
22 testing) had a duration of approximately 2:30 hours.

23 Participants performed 4 task sessions, each with an approximate duration of 15min and  
24 composed of 20 trials - 8 ‘Fractal’, 8 ‘Iteration’ and 4 ‘Repetition’ trials. Trials following  
25 different rules were inter-mixed within each session and pseudo-randomized. The trial  
26 sequence was determined using Optseq2 (<https://surfer.nmr.mgh.harvard.edu/optseq/>) to  
27 maximize the efficiency of fMRI signal acquisition.

28 Trial structure is depicted in Figure 2. We were interested in two periods within each trial,  
29 namely the transition between step II and III – the *planning phase* – and in step III – the  
30 *execution phase*. The *planning phase* was important to capture the computations necessary to  
31 transform step II into step III, and the neural systems instantiating these transformations.

32

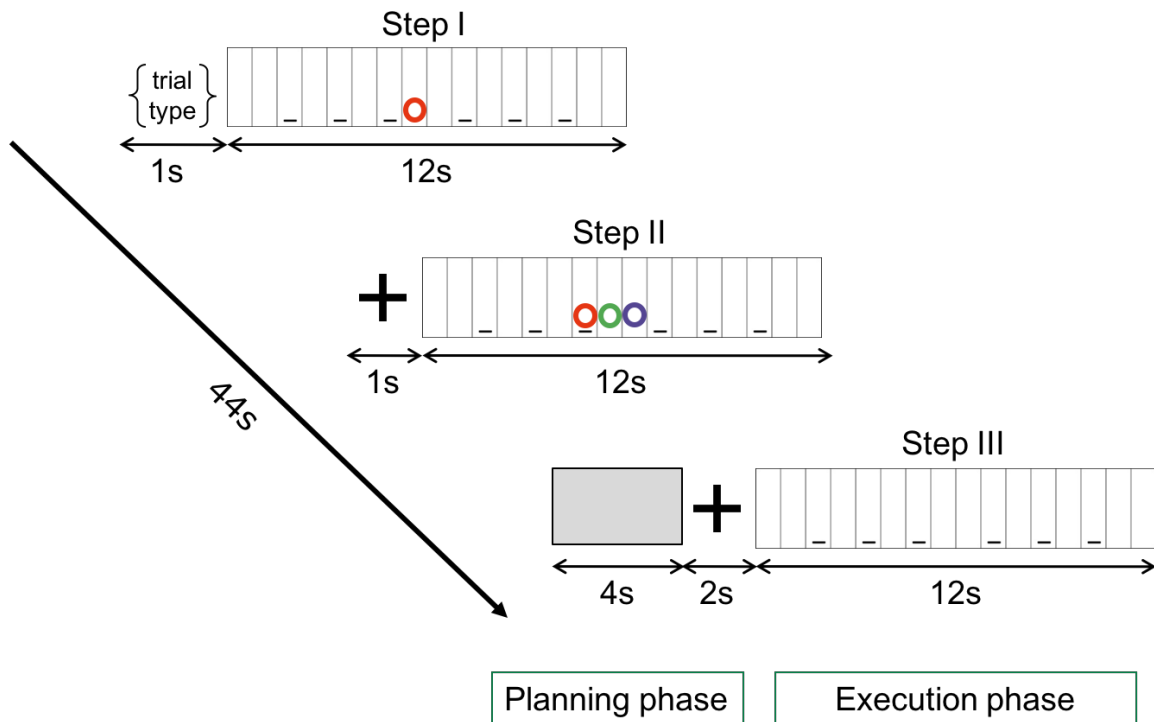

1

2 **Figure 2. Trial structure.** Inside the MR scanner (3-T Skyra, Siemens), participants  
 3 performed 4 sessions of 20 trials each (8 Fractal, 8 Iteration and 4 Repetition trials). All  
 4 trials had the same structure: First, a letter indicated the trial type (Fractal, Iteration or  
 5 Repetition). Then, steps I and II of the sequence were shown on screen, which participants  
 6 had to execute simultaneously on a keyboard (coloured circles indicated which finger to use).  
 7 This was followed by a 6 seconds 'planning phase' composed of a 4 seconds blank screen  
 8 and a 2 seconds crosshair during which participants planned execution of step III. Finally, in  
 9 the 'execution phase', participants performed the correct continuation of the sequence  
 10 without visual cues. Throughout all steps, a metronome sound at 60bpm guided participants'  
 11 pace and the sequence's temporal structure.

12

13 The experimental apparatus is depicted in Figure 3. Participants performed the task while  
 14 lying in the MR scanner, using a silent 16-key MR-compatible piano (Figure 3A). We used a  
 15 dual mirror system, so that participants were able to see both the virtual keyboard projected  
 16 on the screen, and the physical keyboard on which they executed the motor sequences (Figure  
 17 3B). The position of the mirrors was adjusted individually for each participant. Both  
 18 keyboards had visual markers on specific keys for visuo-spatial reference (Figure 3C). On the  
 19 physical keyboard, these references could also be detected by touch. All participants used  
 20 their right hand to perform the motor sequences.

21 At the end of the procedure, participants were given a questionnaire on their cognitive  
 22 strategies used to generate step III across the different tasks (Supplementary Table S1).

23



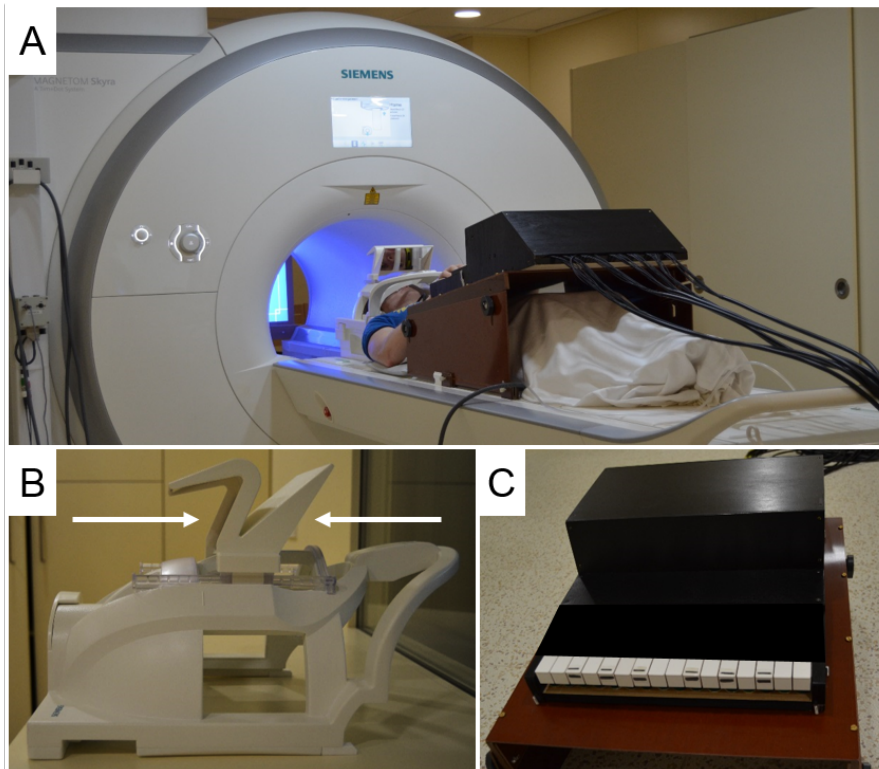

1

2 **Figure 3. fMRI apparatus.** *A.* The keyboard was placed on a custom-made wood stand. This  
3 stand provided a degree of inclination that increased the visibility of the keyboard. The  
4 metronome sound was delivered through MR compatible headphones. **B.** We used a double  
5 mirror system mounted on the head coil, which allowed participants to see both the virtual  
6 keyboard on screen (top mirror, left arrow), and the physical keyboard under their right  
7 hand (bottom mirror, right arrow). We adjusted the position of the mirrors for each  
8 participant to maximize visibility and comfort. **C.** The keyboard was an adapted MR  
9 compatible piano in which the black keys were covered. We added visual and tactile cues on  
10 specific keys that the participants could use for reference. Importantly, pressing the keys on  
11 the keyboard did not generate any sound, and therefore key-tone associations could not be  
12 used in our task, which was purely visuo-motor.

13

#### 14 **Data Acquisition**

15 The experiment was carried out in a 3.0-Tesla Siemens SKYRA whole body magnetic  
16 resonance scanner (Siemens AG, Erlangen, Germany) using a 32-radiofrequency-channel  
17 head coil. During the 4 sessions, functional magnetic resonance images were acquired using a  
18 T2\*-weighted 2D echo planar imaging (EPI) sequence with TE = 30 ms and TR = 2000 ms.  
19 For each session, we acquired 450 volumes with a square FOV of 192 mm, with 31  
20 interleaved slices of 3 mm thickness and 30% gap (3 x 3 x 3 mm<sup>3</sup> voxel size) aligned to the  
21 AC-PC plane, and a flip angle of 90°. T1-weighted images were selected from the database of  
22 the institute for anatomical registration. Some participants had high-resolution T1-weighted  
23 images that were acquired using a 3D MP2RAGE sequence (TI<sub>1</sub> = 700 ms, TI<sub>2</sub> = 2500 ms,  
24 TE = 2.03 ms, TR = 5000 ms) with a matrix size of 240 x 256 x 176, with 1 mm isotropic  
25 voxel size, flip angle<sub>1</sub> of 4°, flip angle<sub>2</sub> of 8°, and GRAPPA acceleration factor of 3.

1

## 2 **Data Analysis**

3

4 **Task-based fMRI.** fMRI data of 20 participants were analysed with statistical  
5 parametric mapping (SPM8; Welcome Trust Centre for Neuroimaging;  
6 <http://www.fil.ion.ucl.ac.uk/spm/software/spm8/>). Anatomical data from high-resolution T1-  
7 weighted images were obtained by masking uniform tissue-contrast image with the 2nd  
8 inversion image from the MP2RAGE sequence. Functional data were pre-processed by  
9 following standard spatial pre-processing procedures. They consisted of: slice time correction  
10 (by means of cubic spline interpolation method), spatial realignment, co-registration of  
11 functional and anatomical data. Then, we performed spatial normalisation into the MNI  
12 (Montreal Neurological Institute) stereotactic space that included resampling to 2 x 2 x 2 mm  
13 voxel size. Finally, data were spatially low-pass filtered using a 3D Gaussian kernel with full-  
14 width at half-maximum (FWHM) of 8 mm and temporally high-pass filtered with a cut-off of  
15 1/128 Hz to eliminate low-frequency drifts.

16 Participants performed 4 sessions. For each of the 4 sessions (sess1-4), statistical parametric  
17 maps for the whole brain data were generated in the context of the general linear model  
18 (GLM) separately for the “planning” and the “execution” phase. The evoked hemodynamic  
19 response to the onset of one or the other phase was modelled for the fractal rule (F), iteration  
20 rule (I) and simple repetition (R) conditions as boxcars convolved with a hemodynamic  
21 response function (HRF). To this design, we added estimated motion realignment parameters  
22 as covariates of no interest to regress out residual motion artefacts and increase statistical  
23 sensitivity. For random effects group analyses, a within-subject flexible factorial ANOVA  
24 was performed on whole brain data with binary grey matter masks thresholded at intensity  
25 value of 0.25. A main effect of TASK was detected in both *planning* and *execution* phases,  
26 while a main effect of SESSION was present only in the *execution phase*. No interaction was  
27 detected. We created statistical parametric maps with t contrasts (SPM{T}). In the *planning*  
28 *phase*, t contrasts were calculated between each task with the following contrasts: F > I, F >  
29 R, I > F, I > R, R > I, R > F. We controlled family-wise error rate (FWER) of clusters below  
30 0.05 with a cluster-forming height-threshold of 0.001. Anatomical labels are based on  
31 Harvard-Oxford cortical and sub-cortical structural atlas implemented in FSL  
32 (<http://neuro.debian.net/pkgs/fsl-harvard-oxford-atlases.html>) and for white matter fibres we  
33 used the JHU DTI-based white-matter atlases ([http://neuro.debian.net/pkgs/fsl-jhu-dti-](http://neuro.debian.net/pkgs/fsl-jhu-dti-whitematter-atlas.html)  
34 [whitematter-atlas.html](http://neuro.debian.net/pkgs/fsl-jhu-dti-whitematter-atlas.html)).

35

36 **PPI.** In the *execution phase*, we found common activation between the contrast F > I  
37 and R > I in a broad fronto-striatal cluster with main peak in the right uncinate fascicle  
38 (common maxima: x = 28, y = 10, z = -12, cluster extent = 1080 voxels for the F > I contrast  
39 and 745 voxels for the R > I contrast). As post-hoc hypothesis, we tested whether the  
40 maximum common to the contrasts F > I and R > I interacted with motor regions during the  
41 implementation of F and R sequences. We thus examined the change in the effective  
42 connectivity of the inferior frontal cluster between F and I tasks, as well as R and I tasks  
43 using PPI analysis (Friston et al. 1997). Similar results in the PPI were obtained by both  
44 contrast-specific analyses. In order to extract voxels of interest (VOIs), a 5 mm sphere was

1 defined around the coordinates ( $x = 28$ ,  $y = 10$ ,  $z = -12$ ) that constituted the peak maxima of  
2 both second level contrasts  $F > I$  and  $R > I$ . In each participants' data, the centre of the VOI was  
3 set to these coordinates. The first eigenvariate of the functional MRI signal changes of the  
4 VOI was extracted and its mean response was multiplied by a task regressor with information  
5 about the experimental conditions ( $F > I$  or  $R > I$ ). This interaction term between source  
6 signal and experimental treatment was the first regressor in the PPI analysis. Additionally, the  
7 mean deconvolved source signal of the VOI and the task regressor were included in the  
8 model as covariates of no interest.

## 11 Results

12 In the present fMRI study, participants generated sequences of finger movements in 3  
13 steps (I, II, III) following one of three rules (Figure 1): (1) a linear Iterative rule, (2) a  
14 hierarchical Fractal rule, or (3) simple Repetition. In the first 2 steps (I, II) participants  
15 executed sequences as demonstrated on the screen. Then, they were asked to generate step III  
16 without visual support (Figure 2). We focused our fMRI analysis on the transition between  
17 step II and III, the 'planning phase' reflecting the generative act, and on step III, the  
18 'execution phase' reflecting the externalization.

19 Overall, we found that during action planning, the generation of new hierarchical  
20 levels (in the Fractal condition) was supported by a bilateral network of brain areas involved  
21 in motor planning and imagery (Hétu et al. 2013; Hardwick et al. 2013), including somato-  
22 motor and premotor cortices, cerebellum, lateral occipital cortex (LOC), and left pallidum.  
23 Furthermore, executing the final sequence when formed by Fractal or simple Repetition rules  
24 entailed an interaction between right fronto-striatal and left hand-motor areas (M1), while  
25 Iteration recruited left hand-motor area only. Crucially, regions of interest (ROI) analyses  
26 within left and right IFG lent no evidence for involvement of this region in the generation of  
27 new hierarchical levels.

### 29 Generation Of New Hierarchical Levels Is Supported By General Networks Of 30 Motor Planning

31 By measuring brain activity in the 'planning phase', we sought to identify neural  
32 networks underlying the cognitive processes that are relevant for the transition between step  
33 II and III, i.e., the generative act as such. In Repetition, this process consisted in holding the  
34 full sequence of step II in memory until its repeated execution in step III (Figure 1B). In the  
35 Iterative rule, this process required the serial addition of one key press to each cluster within  
36 a fixed hierarchical level (Figure 1C), without generation of new levels. The Fractal rule  
37 entailed the generation of new hierarchical levels (Figure 1D) by recursively substituting  
38 each key press  $K_n$  with a new sequence of three key presses  $[K_{n+1} - s, K_{n+1}, K_{n+1} + s]$ . The  
39 parameters of the transformation rule to be applied in each trial's planning phase,  $s$  and initial  
40 key ( $k_0$ ), could be inferred from the transition between steps I and II (see Methods for  
41 details). Participants considered it equally easy to extract these parameters in Fractal and  
42 Iteration ( $p = .2$ ), while it was overall easier in the Repetition condition, as expected  
43 (*Wilcoxon signed-ranks*:  $p$ 's  $< .05$  compared to both Fractal and Iteration).

1 Whole-brain results of the planning phase are depicted in Figure 4 and Table 1. We  
 2 found a clear dissociation between the Fractal rule and both Repetition and Iteration. The  
 3 generation of new hierarchical levels in motor sequences using the Fractal rule was supported  
 4 by a bilateral network known to be involved in motor learning (Hardwick et al. 2013), motor  
 5 planning (Elsinger, Harrington, and Rao 2006) and imagery of motor sequences (Héту et al.  
 6 2013). This network included the sensorimotor and premotor cortices, cerebellum and lateral  
 7 occipital cortex (all clusters  $p < .05$  FWE corrected) and was present in both contrasts  
 8 ‘Fractal > Iteration’ and ‘Fractal > Repetition’. Thus, it was more active for the ‘Fractal rule’  
 9 condition. Additionally, we found the left Pallidum active in the contrast ‘Fractal > Iteration’  
 10 but not in ‘Fractal > Repetition’.

11 The dissociation between the Fractal rule and both Repetition and Iteration was nicely  
 12 reflected in the subjective reports (see Supplementary table S1): in Fractal trials, participants  
 13 (1) relied more on step II for the generation of step III than in both Iteration and Repetition  
 14 ( $p$ 's < .05), (2) they imagined more where the hand should go in key space than in Iteration ( $z$   
 15 = -1.9,  $p = .059$ ) and Repetition ( $z = -2.0$ ,  $p < .05$ ), and (3) they more consciously prepared  
 16 the sequence and thought about the rule in the Fractal condition than in Repetition ( $z = -2.1$ ,  $p$   
 17 < .04). In line with these reports, no activations were found for the Iterative rule or  
 18 Repetition, i.e., the contrasts ‘Iteration > Repetition’, ‘Iteration > Fractal’ and ‘Repetition >  
 19 Fractal’ did not yield significantly active clusters. Only ‘Repetition > Iteration’ revealed  
 20 activity in bilateral inferior lateral temporo-occipital cortex (Table 1).

21 To test whether there were specific activations for the Fractal rule within lateral PFC,  
 22 particularly IFG, we performed four Small Volume Corrected (SVC) analyses within left  
 23 Brodmann Area (BA) 44, left BA 45, right BA 44 and right BA 45. We found no significant  
 24 differences between tasks (with uncorrected  $p < .01$ ).

25 In sum, these findings are in line with the assumption that in the Fractal condition,  
 26 participants engaged in specific computations to transform step II into the final step III  
 27 sequence using an explicit motor-spatial rule. These computations were supported by general  
 28 networks associated with motor planning and imagery, but did not specifically recruit IFG.

29

**Table 1.** Task effect in the planning phase.

| Region                        | Hem. | BA | k    | x   | y   | z   | Z-value |
|-------------------------------|------|----|------|-----|-----|-----|---------|
| <i>Fractal &gt; Iteration</i> |      |    |      |     |     |     |         |
| Cerebellum V                  | R    | -  | 6299 | 22  | -48 | -26 | 6.54    |
|                               |      | -  |      | 4   | -62 | -20 | 6.51    |
|                               |      | -  |      | 4   | -68 | -36 | 6.08    |
| Precentral Gyrus              | R    | 6  | 525  | 42  | -4  | 60  | 4.40    |
|                               |      | 6  |      | 26  | -4  | 52  | 4.26    |
|                               | L    | 6  | 8042 | -34 | -24 | 68  | 6.18    |
|                               |      | 7  |      | -22 | -60 | 60  | 5.96    |
|                               |      | 3  |      | -46 | -34 | 60  | 5.89    |
| Occipital Pole                | R    | 18 | 6613 | 26  | -90 | 10  | 5.24    |

|                                  |   |    |      |     |     |     |   |      |
|----------------------------------|---|----|------|-----|-----|-----|---|------|
|                                  |   |    | 19   |     | 34  | -84 | 2 | 5.20 |
|                                  |   |    | 37   |     | 48  | -64 | 2 | 5.03 |
| Pallidum                         | L | -  | 385  | -24 | -14 |     | 4 | 4.57 |
| <i>Fractal &gt; Repetition</i>   |   |    |      |     |     |     |   |      |
| Cerebellum V                     | R | -  | 2762 | 22  | -48 | -26 |   | 5.93 |
|                                  |   | -  |      | 6   | -58 | -14 |   | 5.51 |
|                                  | L | -  |      | -22 | -52 | -24 |   | 5.19 |
| Postcentral Gyrus                | R | 3  | 1811 | 34  | -34 | 50  |   | 5.03 |
|                                  |   | 7  |      | 22  | -58 | 58  |   | 4.34 |
|                                  |   | 7  |      | 34  | -46 | 68  |   | 4.25 |
| Precentral Gyrus                 | R | 6  | 985  | 42  | -8  | 58  |   | 5.29 |
|                                  |   | 6  |      | 30  | -8  | 54  |   | 4.89 |
|                                  | L | 4  | 5726 | -38 | -22 | 56  |   | 7.23 |
|                                  |   | 7  |      | -24 | -58 | 60  |   | 5.06 |
|                                  |   | 6  |      | -26 | -6  | 52  |   | 4.88 |
| Lateral Occipital Cortex         | R | 37 | 979  | 44  | -60 | 6   |   | 5.44 |
|                                  |   | 18 |      | 24  | -94 | 12  |   | 3.48 |
|                                  |   | 19 |      | 36  | -80 | 2   |   | 3.33 |
| Lateral Occipital Cortex         | L | 37 | 596  | -42 | -64 | 6   |   | 5.13 |
| <i>Repetition &gt; Iteration</i> |   |    |      |     |     |     |   |      |
| Inferior Temporal Gyrus          | R | 37 | 817  | 48  | -60 | -18 |   | 5.99 |
|                                  |   | 20 |      | 50  | -36 | -14 |   | 3.98 |
|                                  |   | 37 |      | 22  | -50 | -14 |   | 3.68 |
| Lateral Occipital Cortex         | L | 19 | 2673 | -44 | -70 | -14 |   | 5.43 |
|                                  |   | 19 |      | -34 | -84 | -12 |   | 4.66 |
| Cerebellum (CrusII)              | L | -  |      | -6  | -84 | -26 |   | 4.38 |

Whole-brain activation cluster sizes (k), MNI coordinates (x, y, z), and Z-scores for the Task contrast in the planning phase ( $p_{\text{voxel}} < .001$ ;  $p_{\text{cluster}} < .05$ , FWE corrected). BA: Brodmann area, Hem.: hemisphere.

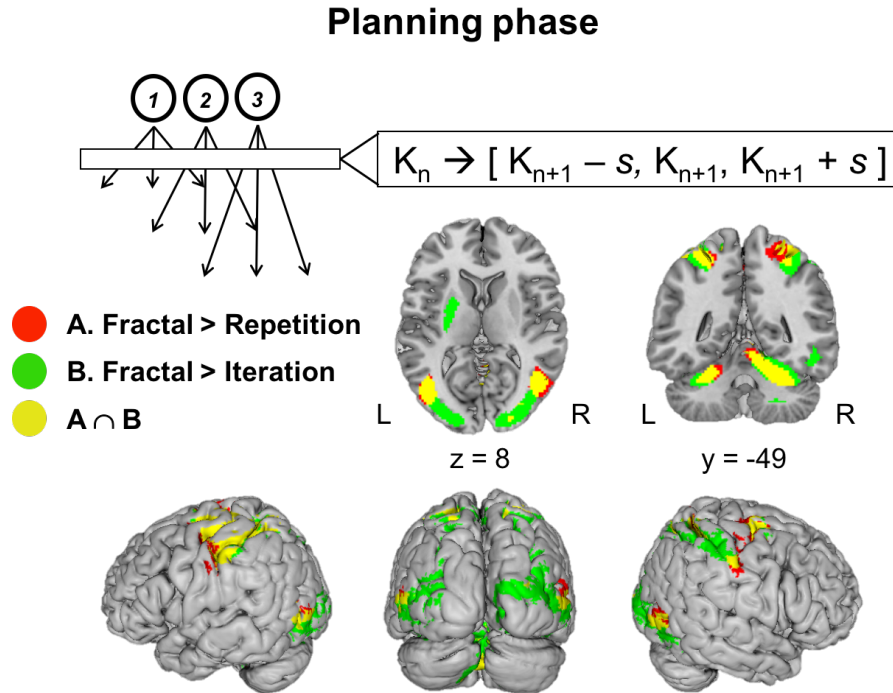

1

2 **Figure 4. Brain activations during the planning phase (between steps II and III).**  
 3 *Application of the Fractal rule yielded stronger activations compared to both Simple*  
 4 *Repetition and Iteration in a bilateral network known to be involved in motor learning,*  
 5 *planning and imagery, including sensorimotor and premotor cortices, cerebellum and lateral*  
 6 *occipital cortex. The reverse contrasts ('Iteration > Fractal' and 'Repetition > Fractal')*  
 7 *did not yield significant activations.*

8

9 **Iterative Sequence Completion Is Solved by peripheral Sensorimotor resources**

10 In the 'execution phase', we found clear similarities between Fractal rule and  
 11 Repetition that both dissociated from Iteration (Figure 5 and Table 2). Note that this pattern  
 12 of results cannot be explained by task difficulty because (1) the sequences to execute were  
 13 motorically identical across all conditions, (2) key press accuracy did not differ between  
 14 conditions (Fractal: mean  $\pm$  SD = 87%  $\pm$  20%; Iteration: 89%  $\pm$  18%; Repetition: 87%  $\pm$   
 15 23%; Generalized score  $\chi^2 = 1.8$ ,  $p = .4$ ), and (3) participants reported similar confidence in  
 16 the correctness of their performance in Fractal and Iteration (*Wilcoxon signed ranks: p > .4*),  
 17 and overall higher confidence in Repetition ( $p$ 's < .05).

18 Sequence execution using the Iterative rule, compared to both Fractal rule and  
 19 Repetition, yielded stronger activations in the sensorimotor hand area with a cluster peak in  
 20 somatosensory cortex ( $x = -52$ ,  $y = -18$ ,  $z = 50$  for both 'Iteration > Fractal' and 'Iteration >  
 21 Repetition'). Conversely, both contrasts 'Fractal > Iteration' and 'Repetition > Iteration'  
 22 yielded significant activations in a large right fronto-striatal cluster which included putamen,  
 23 amygdala, portions of orbitofrontal cortex and peaked in uncinate fasciculus ( $x = 28$ ,  $y = 10$ ,  
 24  $z = -12$ ;  $p < .05$  FWE corrected). A similar left-hemispheric cluster was found for 'Repetition  
 25 > Iteration' only (peak in left amygdala:  $x = -30$ ,  $y = -4$ ,  $z = -16$ , extending into medial

1 temporal lobe and putamen). No significant differences were found between Repetition and  
2 Fractal rule.

3 To test a post-hoc hypothesis of task-related functional connectivity of these fronto-  
4 striatal clusters with the sensorimotor hand area, we performed a whole-brain PPI analysis  
5 seeding in the maxima of the fronto-striatal cluster in the right hemisphere that was common  
6 to the two contrasts. Indeed, we found significant interactions with the hand area in left M1  
7 ('Repetition > Iteration':  $x = -32, y = -26, z = 62$ , cluster extent = 1427 voxels,  $Z = 5.02$ ,  
8  $p_{\text{voxel}} < .001, p_{\text{cluster}} < .001$ ; 'Fractal > Iteration':  $x = -36, y = -24, z = 48$ , cluster extent = 182  
9 voxels,  $Z = 3.96, p_{\text{voxel}} < .001, p_{\text{cluster}} = .114$ ).

10 Similar to the planning phase, we performed four Small Volume Corrected (SVC)  
11 analyses within left BA 44, left BA 45, right BA 44 and right BA 45. We found no significant  
12 differences between tasks (with uncorrected  $p < .01$ ).

13 In sum, during execution of identical motor sequences (that were, however, derived  
14 from different rules), we found cognitive and neural dissociations between Iteration and the  
15 other two rules. These effects were unrelated to the difficulty of execution. While the  
16 Iterative rule correlated more strongly with primary sensorimotor systems, both Repetition  
17 and Fractal rules involved additional motor control instantiated by fronto-striatal areas.

18

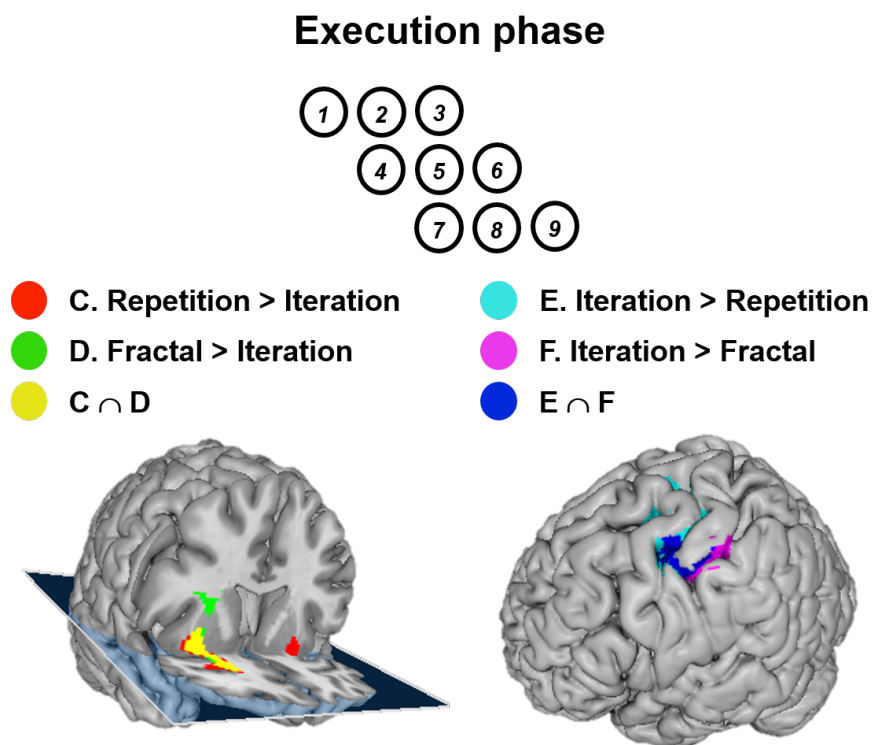

19

20 **Figure 5. Brain activations during the execution phase (step III).** Participants executed  
21 sequences of nine key presses that were identical at the motor output but generated  
22 according to different rules (Fractal, Iteration and Repetition). (1) In contrast with Iteration,  
23 both the Fractal rule and Repetition (C and D) activated a right fronto-striatal cluster

1 (including the basal ganglia and orbitofrontal cortex, with peak in right uncinat fasciculus;  
 2  $x = 28, y = 10, z = -12$ ). This cluster interacted with the hand area in left motor cortex (see  
 3 details of PPI in text); (2) Conversely, execution of the same motor sequences using the  
 4 Iterative rule (E and F) activated the left sensorimotor hand area only ( $x = -52, y = -18, z =$   
 5  $50$ ).

6

**Table 2.** Task effect in the execution phase.

| Region                                           | Hem. | BA | k    | x   | y   | z   | Z-value |
|--------------------------------------------------|------|----|------|-----|-----|-----|---------|
| <i>Iteration &gt; Fractal</i>                    |      |    |      |     |     |     |         |
| Postcentral Gyrus                                | L    | 4  | 1047 | -52 | -18 | 50  | 6.06    |
|                                                  |      | 3  |      | -36 | -20 | 48  | 4.56    |
|                                                  |      | 6  |      | -30 | -24 | 62  | 3.46    |
| <i>Fractal &gt; Iteration</i>                    |      |    |      |     |     |     |         |
| Fronto-striatal<br>(peak in Uncinate Fasciculus) | R    | 48 | 745  | 28  | 10  | -12 | 4.94    |
|                                                  |      | 48 |      | 28  | 6   | 14  | 4.67    |
|                                                  |      | 48 |      | 22  | 20  | 10  | 4.17    |
| <i>Repetition &gt; Iteration</i>                 |      |    |      |     |     |     |         |
| Fronto-striatal<br>(peak in Uncinate Fasciculus) | R    | 48 | 1080 | 28  | 10  | -12 | 5.36    |
|                                                  |      | 48 |      | 32  | -2  | -18 | 4.58    |
|                                                  |      | 47 |      | 26  | 34  | -8  | 4.53    |
| Amygdala                                         | L    | 34 | 2216 | -30 | -4  | -16 | 5.05    |
|                                                  |      | 20 |      | -42 | -6  | -28 | 4.59    |
|                                                  |      | 37 |      | -34 | -34 | -14 | 4.53    |

7 Whole-brain activation cluster sizes (k), MNI coordinates (x, y, z), and Z-scores for the Task  
 8 contrast in the execution phase ( $p_{\text{voxel}} < .001$ ;  $p_{\text{cluster}} < .05$ , FWE corrected). BA: Brodmann  
 9 area, Hem.: hemisphere.

10

11

## Discussion

12 To our knowledge, the present study is the first to investigate the neural systems involved in  
 13 the generation and overt production of motor hierarchies. In addition, we could separate the  
 14 core generative act from its externalization components. To do so, we developed a novel  
 15 paradigm that contrasted (1) sequences of finger movements formed according to a  
 16 hierarchy-generating Fractal rule with (2) identical sequences formed according to rules that  
 17 did not require generation of new hierarchical levels (Iteration and Repetition). Each motor  
 18 sequence was composed of two initial steps (I and II) to establish the rules and their  
 19 parameters that then had to be applied to freely generate the correct continuation of the  
 20 sequence in step III. Repetition implied buffering of the given motor sequence  $[[K-2, K-1, K]$   
 21  $[K-1, K, K+1]$   $[K, K+1, K+2]]$  and Iteration required the completion of a pattern  $[[K-2, K-1,$   
 22  $__ ] [K-1, K, __ ] [K, K+1, __ ]]$  using within-level transformations. Only the Fractal rule  
 23 entailed the generation of new hierarchical levels through the recursive substitution of each  
 24 finger movement  $K_n$  with a sequence of three finger movements  $[K_{n+1} - s, K_{n+1}, K_{n+1} + s]$ .  
 25 Accordingly, participants reported mostly for the Fractal condition that they relied on step II  
 26 to consciously prepare the final sequence, and imagined the sequence prior to execution.  
 27 Nevertheless, Fractal and Iterative conditions did not differ in correctness of their execution



1 or in subjective reports of general difficulty. Therefore, our discussion focuses on the  
2 cognitive and functional interpretation of the different neural responses associated with these  
3 two particular rules.

4 Our first important finding was that the generation of new hierarchical levels using the  
5 Fractal (compared to Iterative) rule was supported by a general network of areas involved in  
6 motor learning, planning and imagery (Hétu et al. 2013; Hardwick et al. 2013; Elsinger,  
7 Harrington, and Rao 2006). This bilateral network included the sensorimotor and premotor  
8 cortices, cerebellum, lateral occipital cortex, and left pallidum. Interestingly, in this study,  
9 which focused on the motor domain, these generative processes did not seem to specifically  
10 recruit IFG, an area thought to play an important role in the processing of hierarchies across  
11 domains (Jeon 2014; Fitch and Martins 2014; Fadiga, Craighero, and D'Ausilio 2009).

12 Our second relevant finding was that execution of both Fractal sequences and simple  
13 Repetition (compared to Iterative sequences) involved right fronto-striatal regions that were  
14 coupled with the left hand-motor area. This activity may reflect the buffering of previously  
15 formed motor sequences (see below). In contrast, the execution of Iterative sequences  
16 involved the sensorimotor hand area only. Note that these differences occurred despite the  
17 fact that the motor sequences were identical in their execution.

18 We interpret these results within the framework of discrete sequence production models  
19 (Verwey 2001; Verwey, Shea, and Wright 2014). According to them, performance involves  
20 (1) sequence generation and motor loading during planning, followed by (2) fast execution of  
21 the motor buffer content by effector-specific motor processors. The generation of new  
22 hierarchical levels in the Fractal rule puts particular strain on stage (1), the planning of the  
23 final sequence. Unlike in Repetition and Iteration where the motor program is (partly)  
24 available already in step II, performers have to use their rule knowledge in the Fractal  
25 condition to construct the appropriate sequence continuation. Interestingly, they seem to do  
26 so without involving lateral PFC/IFG as proclaimed hierarchy processor but by means of  
27 general mechanisms of visuo-motor imagery and planning as shown by stronger activity in  
28 bilateral visuo-motor networks (Hardwick et al. 2013).

29 Once formed, these motor programs are buffered in fronto-striatal areas and sent to the hand  
30 area for execution as suggested by increased cortico-striatal connectivity in the PPI analysis.  
31 Our data speak for a similar buffering and transmission during Fractal and simple Repetition  
32 that does, however, not apply to Iteration. This latter finding together with generally less  
33 involvement of resources for planning suggest that motor sequences following Iterative rules  
34 might be completed via mechanisms supported by the sensorimotor hand area directly during  
35 execution. In other words, the motor buffer may simply hold the 6-key sequence of step II,  
36 thus imposing less resource demands on the motor buffer, while the ultimate 9-key sequence  
37 is completed on the fly during execution.

38 Overall, the differences between Fractal and Iteration reflect different mechanisms of motor  
39 sequence generation involving between-level vs. within-level hierarchical processing: while  
40 the generation of new hierarchical levels in the Fractal rule demands more planning  
41 resources, serial completion of motor sequences in the Iterative rule is resolved using  
42 mechanisms supported by the primary sensorimotor cortex. This suggests that iterative, serial

1 generation of motor sequences might be the default strategy of motor production when  
2 hinging mainly on the primary sensorimotor cortex.

### 3 **Prior hypotheses: The Role of lateral PFC/IFG**

4 Based on current views that IFG is involved in the processing of hierarchies across many  
5 domains (Fitch and Martins 2014; Fadiga, Craighero, and D'Ausilio 2009; Jeon 2014) and in  
6 line with models of a posterior to anterior gradient of lateral PFC for hierarchical  
7 organization of actions (Koechlin and Summerfield 2007; Badre 2008), we hypothesized  
8 lateral PFC, and particularly IFG, to be a likely candidate for the motor *generation* of new  
9 hierarchical levels in our Fractal rule condition. However, we did not find evidence for  
10 specific involvement of this area in the generation of new hierarchical levels. How can our  
11 results be reconciled with the previous literature?

12 On the one hand, the absence of lateral PFC activation in our task might indicate that this  
13 region is sensitive to hierarchies of action goals (or other non-motor contextual dependencies  
14 (Badre 2008)), rather than to transparent rules describing cross-level relations in motor  
15 hierarchies (i.e. inducible without prior instruction) as tested in our task. Alternatively, the  
16 resources necessary to *discriminate* hierarchical sequences may not completely overlap with  
17 those used for the *generation* of new hierarchical levels, in that discrimination recruits  
18 numerous additional cognitive mechanisms that are not relevant during generation but may  
19 well account for IFG effects. For example, building hierarchies from sequential input during  
20 *discrimination* also poses demands on resources required more generally for sequence  
21 encoding, buffering and template matching (Bornkessel-Schlesewsky et al. 2015; Fitch and  
22 Martins 2014), that may not be taxed to the same degree during the *generation* of hierarchical  
23 structures in the motor domain. Importantly, most discrimination studies found greater IFG  
24 involvement in material that drew strongly on these general resources, e.g., by using  
25 sequences that were violations (Molnar-szakacs, Iacoboni, and Koski 2005; Novick,  
26 Trueswell, and Thompson-Schill 2005; Bianco et al. 2016), had greater ambiguity (Vitello  
27 and Rodd 2015; Rodd et al. 2015), longer dependencies or posed higher demands on working  
28 memory than respective control sequences (Braver et al. 1997; Baddeley 2003). This makes it  
29 difficult to dissociate the contribution of specific hierarchical generativity and general  
30 cognitive control/sequence encoding processes to the observed IFG activations. Our design  
31 not only balanced the amount of required cognitive control across conditions (recall that final  
32 sequences were always correct, unambiguous and identical across conditions, although based  
33 on different rules); it also allowed us to study hierarchy processing stripped off general  
34 processes required for parsing temporally evolving sequences by specifically targeting  
35 hierarchy *generation* (in the planning phase). Consequently, the fact that we did not find  
36 evidence for lateral PFC involvement challenges the notion of multi-domain hierarchical  
37 generativity in IFG (Fadiga, Craighero, and D'Ausilio 2009; Fitch and Martins 2014) and  
38 rather argues for its more general function during encoding of structured sequences.

### 39 **Theoretical implications and future research**

40 Humans are exceptional in their ability to generate hierarchical structures. However, the  
41 cognitive and neural mechanisms underlying this capacity remain speculative. To date, it is  
42 linguistics that provides the most concise/influential account for hierarchical generativity

1 (Berwick and Chomsky 2015), by proposing that this capacity results from three components:  
2 (i) a core recursive ability which assembles syntactic structures, (ii) peripheral systems  
3 necessary for their encoding and externalization (conceptual-intentional and sensorimotor)<sup>1</sup>  
4 and (iii) the interface between (i) and (ii). Within this framework, the core recursive ability (i)  
5 is hierarchical and independent of serial order. Thus, the apparent serial order of language  
6 would be the result of processes of externalization, given that the motor output system is  
7 obligatorily serial.

8 This proposed architecture poses a general empirical challenge, not only in language but also  
9 in other domains. As reviewed above, previous research investigating the processing of  
10 hierarchical structures focused on the *discrimination* of well-formed structures vs. violations  
11 (e.g., AABB vs. AABA), and/or structures with long-distance vs. local dependencies (e.g.,  
12 AABB vs. ABAB). Crucially, these designs entail to contrast fMRI activity between stimuli  
13 that are different in both their deep structure (internal, hierarchical) and surface structure  
14 (external, serial). As a consequence, we cannot separate the resources that are active due to  
15 the hierarchical generative processes from those due to differences in the externalization  
16 components (e.g. working memory, top-down predictions in sequence parsing).

17 Our design acknowledges these difficulties and circumvented them by explicitly separating  
18 the generative act (planning phase) from the externalization (execution phase). Additionally,  
19 since the structures to be generated and executed were identical across conditions regarding  
20 their surface structure, we could keep the externalization confounds constant. Therefore, we  
21 provide new support for the classical generative architecture (Figure 5) with two important  
22 findings. First, the Fractal rule, which heavily hinges on the generation of new hierarchical  
23 levels (or branches), increased demands on the motor planning network, and not IFG/PFC.  
24 Second, the Iterative rule, which is traditionally serial, increased demands on the  
25 externalization components, namely the sensorimotor cortex. This implies that in the domain  
26 that we studied here, motor specific (rather than multi-domain) functional networks qualify as  
27 neural bases for different components of hierarchy generation, and that this ability in other  
28 domains can (and should) be scrutinised by taking its different components into account.

29 One last important theoretical issue: Even though our design isolates the “generation of new  
30 hierarchical levels”, this pertains to the *application* of well-learned hierarchical rules,  
31 independently on how these were acquired (Lungu et al. 2014). In this expertise stage, “rule  
32 application” might reflect either the execution of combinatorial computations specifically  
33 involved in the generation of new hierarchical levels, or simply the retrieval of previously  
34 formed hierarchical representations (Figure 5), which remain stored as “schemas” within the  
35 motor network (Wiestler and Diedrichsen 2013). Despite one linguistic study attempting to  
36 separate the *acquisition* and *application* phases of hierarchical rule processing (Opitz and  
37 Friederici 2003), more investigation is needed to dissociate the neural bases of hierarchical  
38 generativity “on the fly” or “schema” retrieval (Figure 5). Although our study was not  
39 designed to solve this issue, a necessary future step will be to test unexperienced participants

---

<sup>1</sup> In the generative terminology, the primary sensorimotor cortex would be included in the “peripheral” encoding/externalization system, which is distinct from the anatomical notion of “peripheral” nervous system.

1 to isolate the initial generative processes underlying structure building, without potential  
 2 previously formed schemas present in long-term memory.

3

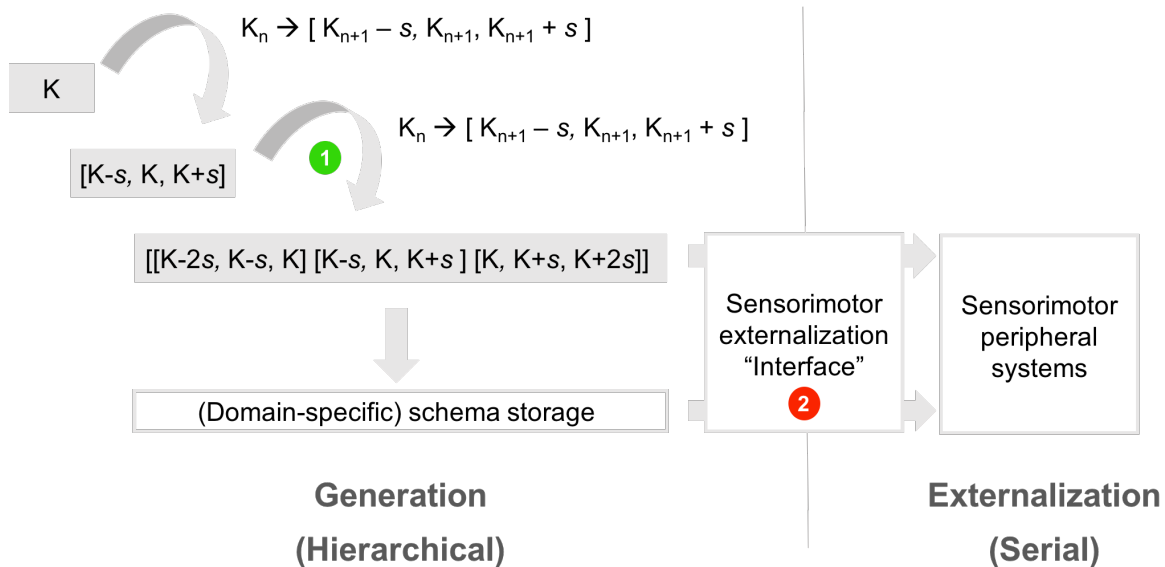

4 1 Hierarchical branching 2 Serialization / buffering

5 **Figure 5.** With our design, we explicitly separated the processes underlying the generation of  
 6 hierarchical levels (left) from those used to externalize and execute motor programs (right).  
 7 While the generation of new hierarchical levels in the Fractal rule involves hierarchical  
 8 branching (left) which is not bounded to serial code, iterative completion of motor sequences  
 9 is resolved using peripheral sensorimotor mechanisms (including computations within the  
 10 primary sensorimotor cortices), which are serial (right). It should be mentioned that  
 11 activations referring to the generation of new hierarchical levels can potentially involve either  
 12 *de novo* combinatorial operations (upper cascade), or the retrieval of previously formed  
 13 hierarchical representations (lower transparent box). The products of hierarchy-generating  
 14 rules (e.g.  $[[K-2s, K-s, K] [K-s, K, K+s] [K, K+s, K+2s]]$ ) might become schematized and  
 15 stored in domain-specific networks from which they are retrieved during sequence  
 16 generation. The schema would retain the clustered hierarchical structure and a set of free  
 17 parameters (in this study the initial key  $K$ , and contour variable  $s$ ). Importantly, even if the  
 18 latter were the underlying mechanism, participants would have to extract and apply the  
 19 parameters from the second step of each trial. Thus, irrespective of whether processing is  
 20 based on combinatorial operations or retrieval of schemas, it would entail flexible generation  
 21 of hierarchical motor sequences.

22

## 23 **Conclusion**

24 In this study, we isolate the processes involved in generating motor hierarchies while  
 25 separating them from other motor externalization components. Our results challenge the  
 26 notion that a putative multi-domain hierarchical processor in the lateral PFC is necessary for  
 27 the generation of hierarchical levels in motor sequence production. Instead, the generation of

1 motor hierarchical structures via the application of recursive “fractal” rules was supported by  
2 a neural system used for motor learning and motor planning. While these systems might be  
3 important to *parse* hierarchical sequences in a multi-domain fashion, due to encoding and  
4 externalization processes, they do not seem to necessarily be so for the *generation* of new  
5 hierarchical levels.

6

## 7 **Acknowledgments**

8 The authors are grateful to Sven Gutkunst and Jöran Lepsien for technical support.

9

## 10 **Author contributions**

11 Mauricio J.D. Martins Roberta Bianco contributed project conception, experimental design  
12 and setup, data acquisition and analysis, data interpretation, writing the manuscript;

13 Daniela Sammler and Arno Villringer contributed supervision of the project, project  
14 conception, data interpretation, writing the manuscript.

15

## 16 **Data availability**

17 The data that support the findings of this study are available from the corresponding  
18 author upon reasonable request. Authors can confirm that all relevant data are included in the  
19 paper and/or its supplementary information files.

20

## 21 **References**

- 22 Baddeley, Alan. 2003. “Working Memory: Looking Back and Looking Forward.” *Nature*  
23 *Reviews Neuroscience* 4 (10): 829–39. doi:10.1038/nrn1201.
- 24 Badre, David. 2008. “Cognitive Control, Hierarchy, and the Rostro-Caudal Organization of  
25 the Frontal Lobes.” *Trends in Cognitive Sciences* 12 (5): 193–200.  
26 doi:10.1016/j.tics.2008.02.004.
- 27 Badre, David, and Mark D’Esposito. 2009. “Is the Rostro-Caudal Axis of the Frontal Lobe  
28 Hierarchical?” *Nature Reviews Neuroscience* 10 (9): 659–69. doi:10.1038/nrn2667.
- 29 Bahlmann, Jörg, Ricarda I Schubotz, and Angela D Friederici. 2008. “Hierarchical Artificial  
30 Grammar Processing Engages Broca’s Area.” *NeuroImage* 42 (2): 525–34.  
31 doi:10.1016/j.neuroimage.2008.04.249.
- 32 Bahlmann, Jörg, Ricarda I Schubotz, Jutta L Mueller, Dirk Koester, and Angela D Friederici.  
33 2009. “Neural Circuits of Hierarchical Visuo-Spatial Sequence Processing.” *Brain*  
34 *Research* 1298: 161–70. doi:10.1016/j.brainres.2009.08.017.
- 35 Berwick, Robert C, and Noam Chomsky. 2015. *Why Only Us: Language and Evolution*. The  
36 MIT Press.
- 37 Bianco, R., G. Novembre, P.E. Keller, Seung-Goo Kim, F. Scharf, A.D. Friederici, A.  
38 Villringer, and D. Sammler. 2016. “Neural Networks for Harmonic Structure in Music  
39 Perception and Action.” *NeuroImage*. doi:10.1016/j.neuroimage.2016.08.025.
- 40 Boecker, H, J Jankowski, P Ditter, and L Scheef. 2008. “A Role of the Basal Ganglia and  
41 Midbrain Nuclei for Initiation of Motor Sequences.” *NeuroImage* 39 (3): 1356–69.  
42 doi:10.1016/j.neuroimage.2007.09.069.

- 1 Bornkessel-Schlesewsky, Ina, Matthias Schlesewsky, Steven L Small, and Josef P  
2 Rauschecker. 2015. "Neurobiological Roots of Language in Primate Audition: Common  
3 Computational Properties." *Trends in Cognitive Sciences* 19 (3). Elsevier Ltd: 142–50.  
4 doi:10.1016/j.tics.2014.12.008.
- 5 Braver, Todd S, Jonathan D Cohen, L E Nystrom, John Jonides, Edward E Smith, and  
6 Douglas C Noll. 1997. "A Parametric Study of Prefrontal Cortex Involvement in Human  
7 Working Memory." *NeuroImage* 5 (1): 49–62. doi:10.1006/nimg.1996.0247.
- 8 Conway, Christopher M, and Morten H Christiansen. 2001. "Sequential Learning in Non-  
9 Human Primates." *Trends in Cognitive Sciences* 5 (12): 539–46. doi:10.1016/S1364-  
10 6613(00)01800-3.
- 11 Dehaene, Stanislas, Florent Meyniel, Catherine Wacongne, Liping Wang, and Christophe  
12 Pallier. 2015. "The Neural Representation of Sequences: From Transition Probabilities  
13 to Algebraic Patterns and Linguistic Trees." *Neuron* 88 (1). Elsevier Inc.: 2–19.  
14 doi:10.1016/j.neuron.2015.09.019.
- 15 Elsinger, C L, D L Harrington, and S M Rao. 2006. "From Preparation to Online Control:  
16 Reappraisal of Neural Circuitry Mediating Internally Generated and Externally Guided  
17 Actions." *NeuroImage* 31 (3): 1177–87. doi:10.1016/j.neuroimage.2006.01.041.
- 18 Everaert, Martin B.H., Marinus A.C. Huybregts, Noam Chomsky, Robert C. Berwick, and  
19 Johan J. Bolhuis. 2015. "Structures, Not Strings: Linguistics as Part of the Cognitive  
20 Sciences." *Trends in Cognitive Sciences* 19 (12). Elsevier Ltd: 729–43.  
21 doi:10.1016/j.tics.2015.09.008.
- 22 Fadiga, Luciano, Laila Craighero, and Alessandro D'Ausilio. 2009. "Broca's Area in  
23 Language, Action, and Music." *Annals of the New York Academy of Sciences* 1169 (1):  
24 448–58. doi:10.1111/j.1749-6632.2009.04582.x.
- 25 Fazio, Patrik, Anna Cantagallo, Laila Craighero, Alessandro D'ausilio, Alice C Roy, Thierry  
26 Pozzo, Ferdinando Calzolari, Enrico Granieri, and Luciano Fadiga. 2009. "Encoding of  
27 Human Action in Broca's Area." *Brain* 132 (7): 1980–88. doi:10.1093/brain/awp118.
- 28 Fitch, W.T., and Angela D Friederici. 2012. "Artificial Grammar Learning Meets Formal  
29 Language Theory: An Overview." *Philosophical Transactions of the Royal Society B:  
30 Biological Sciences* 367 (1598): 1933–55. doi:10.1098/rstb.2012.0103.
- 31 Fitch, W.T., and Maurício Dias Martins. 2014. "Hierarchical Processing in Music, Language,  
32 and Action: Lashley Revisited." *Annals of the New York Academy of Sciences* 1316 (1):  
33 87–104. doi:10.1111/nyas.12406.
- 34 Friederici, Angela D, Jörg Bahlmann, Roland Friedrich, and Michiru Makuuchi. 2011. "The  
35 Neural Basis of Recursion and Complex Syntactic Hierarchy." *Learning* 5 (1): 87–104.  
36 <http://www.biolinguistics.eu/index.php/biolinguistics/article/view/170>.
- 37 Friston, K J, C Buechel, G R Fink, J Morris, E Rolls, and R J Dolan. 1997.  
38 "Psychophysiological and Modulatory Interactions in Neuroimaging." *NeuroImage* 6  
39 (3): 218–29. doi:10.1006/nimg.1997.0291.
- 40 Geambasu, Andreea, Andrea Ravignani, and Clara C Levelt. 2016. "Preliminary Experiments  
41 on Human Sensitivity to Rhythmic Structure in a Grammar with Recursive Self-  
42 Similarity." *Frontiers in Neuroscience* 10 (June): 1–7. doi:10.3389/fnins.2016.00281.
- 43 Hardwick, Robert M, Claudia Rottschy, R Chris Miall, and Simon B Eickhoff. 2013. "A  
44 Quantitative Meta-Analysis and Review of Motor Learning in the Human Brain."  
45 *NeuroImage* 67. Elsevier Inc.: 283–97. doi:10.1016/j.neuroimage.2012.11.020.
- 46 Héту, Sébastien, Mathieu Grégoire, Arnaud Saimpont, Michel Pierre Coll, Fanny Eugène,  
47 Pierre Emmanuel Michon, and Philip L Jackson. 2013. "The Neural Network of Motor  
48 Imagery: An ALE Meta-Analysis." *Neuroscience and Biobehavioral Reviews* 37 (5).  
49 Elsevier Ltd: 930–49. doi:10.1016/j.neubiorev.2013.03.017.
- 50 Hulst, Harry van der. 2010. "Re Recursion." JOUR. In *Recursion and Human Language*, xv–

- 1 liii. Berlin, Boston: De Gruyter Mouton. doi:10.1515/9783110219258.
- 2 Jeon, Hyeon-Ae. 2014. "Hierarchical Processing in the Prefrontal Cortex in a Variety of  
3 Cognitive Domains." *Frontiers in Systems Neuroscience* 8 (November): 223.  
4 doi:10.3389/fnsys.2014.00223.
- 5 Koechlin, Etienne, and Thomas Jubault. 2006. "Broca's Area and the Hierarchical  
6 Organization of Human Behavior." *Neuron* 50 (6): 963–74.  
7 doi:10.1016/j.neuron.2006.05.017.
- 8 Koechlin, Etienne, and Christopher Summerfield. 2007. "An Information Theoretical  
9 Approach to Prefrontal Executive Function." *Trends in Cognitive Sciences* 11 (6): 229–  
10 35. doi:10.1016/j.tics.2007.04.005.
- 11 Lindenmayer, Aristid. 1968. "Mathematical Models for Cellular Interactions in Development  
12 I. Filaments with One-Sided Inputs." *Journal of Theoretical Biology* 18 (3). Academic  
13 Press: 280–99. doi:10.1016/0022-5193(68)90079-9.
- 14 Lungu, Ovidiu, Oury Monchi, Geneviève Albouy, Thomas Jubault, Emanuelle Ballarin, Yves  
15 Burnod, and Julien Doyon. 2014. "Striatal and Hippocampal Involvement in Motor  
16 Sequence Chunking Depends on the Learning Strategy" 9 (8): 25–27.  
17 doi:10.1371/journal.pone.0103885.
- 18 Maess, Burkhard, S Koelsch, Thomas C Gunter, and Angela D Friederici. 2001. "Musical  
19 Syntax Is Processed in Broca's Area: An MEG Study." *Nature Neuroscience* 4 (5): 540–  
20 45. doi:10.1038/87502.
- 21 Makuuchi, Michiru, Jörg Bahlmann, Alfred Anwander, and Angela D Friederici. 2009.  
22 "Segregating the Core Computational Faculty of Human Language from Working  
23 Memory." *Proceedings of the National Academy of Sciences of the United States of*  
24 *America* 106 (20): 8362–67. doi:10.1073/pnas.0810928106.
- 25 Martins, Maurício Dias. 2012. "Distinctive Signatures of Recursion." *Philosophical*  
26 *Transactions of the Royal Society B: Biological Sciences* 367 (1598).  
27 doi:10.1098/rstb.2012.0097.
- 28 Martins, Maurício Dias, F P Fischmeister, E Puig-Waldmüller, Jinook Oh, A Geibler, S  
29 Robinson, W.T. Fitch, and R Beisteiner. 2014. "Fractal Image Perception Provides  
30 Novel Insights into Hierarchical Cognition." *NeuroImage* 96: 300–308.  
31 doi:10.1016/j.neuroimage.2014.03.064.
- 32 Martins, Maurício Dias, Bruno Gingras, Estela Puig-Waldmueller, and W.T. Fitch. 2017.  
33 "Cognitive Representation Of 'music Fractals': Processing Hierarchy and Recursion in  
34 the Auditory Domain." *Cognition* 161: 31–45.
- 35 Martins, Maurício Dias, Isabel Pavão Martins, and W.T. Fitch. 2015. "A Novel Approach to  
36 Investigate Recursion and Iteration in Visual Hierarchical Processing." *Behavior*  
37 *Research Methods*, 1–22. doi:10.3758/s13428-015-0657-1.
- 38 Molnar-szakacs, Istvan, Marco Iacoboni, and Lisa Koski. 2005. "Functional Segregation  
39 within Pars Opercularis of the Inferior Frontal Gyrus : Evidence from fMRI Studies of  
40 Imitation and Action Observation," no. July: 986–94. doi:10.1093/cercor/bhh199.
- 41 Müllensiefen, Daniel, Bruno Gingras, Jason Musil, Lauren Stewart, DJ Levitin, S Hallam, S  
42 Hallam, et al. 2014. "The Musicality of Non-Musicians: An Index for Assessing Musical  
43 Sophistication in the General Population." Edited by Joel Snyder. *PLoS ONE* 9 (2).  
44 Public Library of Science: e89642. doi:10.1371/journal.pone.0089642.
- 45 Novick, Jared M, John C Trueswell, and Sharon L Thompson-Schill. 2005. "Cognitive  
46 Control and Parsing: Reexamining the Role of Broca's Area in Sentence  
47 Comprehension." *Cognitive, Affective & Behavioral Neuroscience* 5 (3): 263–81.  
48 doi:10.3758/CABN.5.3.263.
- 49 Oechslin, Mathias S, Markus Gschwind, and Clara E James. 2017. "Tracking Training-  
50 Related Plasticity by Combining fMRI and DTI : The Right Hemisphere Ventral Stream

- 1 Mediates Musical Syntax Processing,” 1–10. doi:10.1093/cercor/bhx033.
- 2 Opitz, Bertram, and Angela D Friederici. 2003. “Interactions of the Hippocampal System and  
3 the Prefrontal Cortex in Learning Language-like Rules.” *NeuroImage* 19 (4): 1730–37.  
4 doi:10.1016/S1053-8119(03)00170-8.
- 5 Pallier, Christophe, Anne-Dominique Devauchelle, and Stanislas Dehaene. 2011. “Cortical  
6 Representation of the Constituent Structure of Sentences.” *Proceedings of the National  
7 Academy of Sciences of the United States of America* 108 (6): 2522–27.  
8 doi:10.1073/pnas.1018711108.
- 9 Patel, Aniruddh D. 2003. “Language, Music, Syntax and the Brain.” *Nature Neuroscience* 6  
10 (7): 674–81. doi:10.1038/nn1082.
- 11 Petersson, Karl Magnus, Vasiliki Folia, and Peter Hagoort. 2012. “What Artificial Grammar  
12 Learning Reveals about the Neurobiology of Syntax.” *Brain and Language* 120 (2).  
13 Elsevier Inc.: 83–95. doi:10.1016/j.bandl.2010.08.003.
- 14 Rodd, Jennifer M, Sylvia Vitello, Anna M Woollams, and Patti Adank. 2015. “Localising  
15 Semantic and Syntactic Processing in Spoken and Written Language Comprehension:  
16 An Activation Likelihood Estimation Meta-Analysis.” *Brain and Language* 141.  
17 Elsevier Inc.: 89–102. doi:10.1016/j.bandl.2014.11.012.
- 18 Sammler, Daniela, S Koelsch, and Angela D Friederici. 2011. “Are Left Fronto-Temporal  
19 Brain Areas a Prerequisite for Normal Music-Syntactic Processing?” *Cortex* 47 (6):  
20 659–73. doi:10.1016/j.cortex.2010.04.007.
- 21 Sammler, Daniela, Stefan Koelsch, Tonio Ball, Armin Brandt, Maren Grigutsch, Hans-jürgen  
22 Huppertz, Thomas R Knösche, et al. 2013. “NeuroImage Co-Localizing Linguistic and  
23 Musical Syntax with Intracranial EEG.” *NeuroImage* 64. Elsevier Inc.: 134–46.  
24 doi:10.1016/j.neuroimage.2012.09.035.
- 25 Verwey, Willem B. 2001. “Concatenating Familiar Movement Sequences: The Versatile  
26 Cognitive Processor.” *Acta Psychologica* 106 (1–2): 69–95. doi:10.1016/S0001-  
27 6918(00)00027-5.
- 28 Verwey, Willem B, Charles H Shea, and David L Wright. 2014. “A Cognitive Framework for  
29 Explaining Serial Processing and Sequence Execution Strategies .” *Psychological  
30 Bulletin*, 1–59. doi:10.3758/s13423-014-0773-4.
- 31 Vitello, Sylvia, and Jennifer M Rodd. 2015. “Resolving Semantic Ambiguities in Sentences:  
32 Cognitive Processes and Brain Mechanisms.” *Language and Linguistics Compass* 9  
33 (10): 391–405. doi:10.1111/lnc3.12160.
- 34 Wiestler, Tobias, and Jörn Diedrichsen. 2013. “Skill Learning Strengthens Cortical  
35 Representations of Motor Sequences,” 1–20. doi:10.7554/eLife.00801.
- 36 Wilson, Benjamin, William D Marslen-Wilson, and Christopher I Petkov. 2017. “Conserved  
37 Sequence Processing in Primate Frontal Cortex.” *Trends in Neurosciences* 40 (2).  
38 Elsevier Ltd: 72–82. doi:10.1016/j.tins.2016.11.004.
- 39
